# Supplementary material for: K-doped FeOOH/Fe3O4 nanoparticles grown on a stainless steel substrate with superior and increasing specific capacity
Source: Royal Society of Chemistry journal article supplement (doi:10.1039/c8dt04974b), 2019-01-01
Supplement: c8dt04974b1.pdf [file c8dt04974b1.pdf]

Supporting Information: K-doped FeOOH/Fe<sub>3</sub>O<sub>4</sub>  
nanoparticles grown on stainless steel substrate with  
superior and increasing specific capacity

*Haiqiang Luo, Keyu Tao and Yun Gong\**

Department of Applied Chemistry, College of Chemistry and Chemical Engineering,  
Chongqing University, Chongqing 401331, P. R. China.

\*Corresponding author's email: [gongyun7211@cqu.edu.cn](mailto:gongyun7211@cqu.edu.cn)

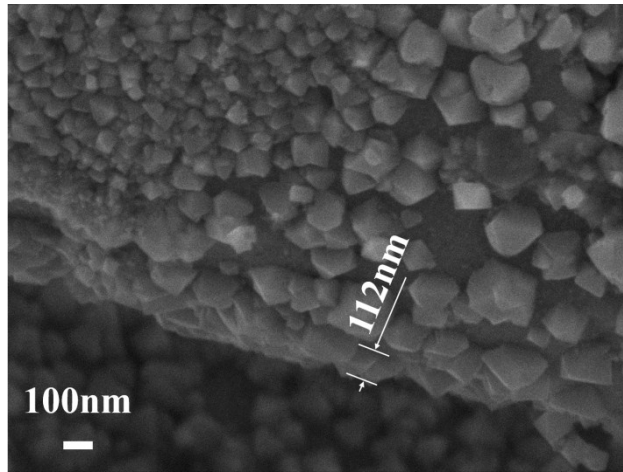

**Figure S1** Cross section image of K-doped FeOOH/Fe<sub>3</sub>O<sub>4</sub>/SS.

**(a)**

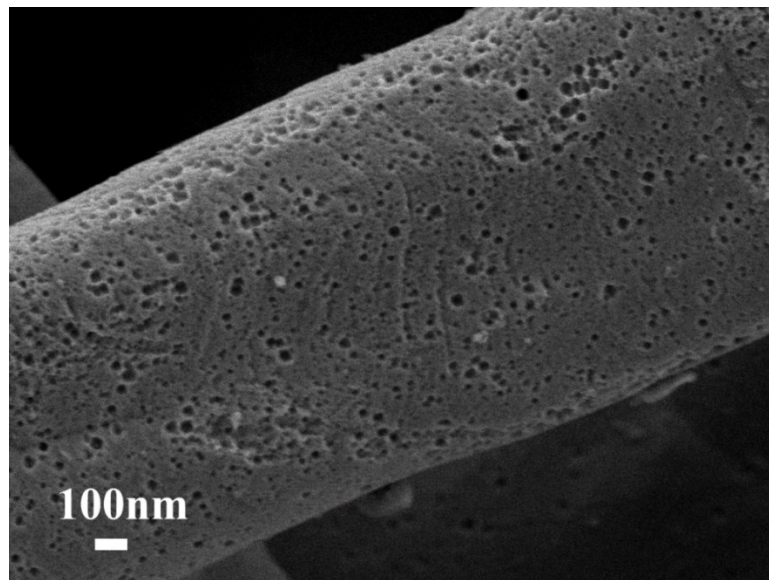

**(b)**

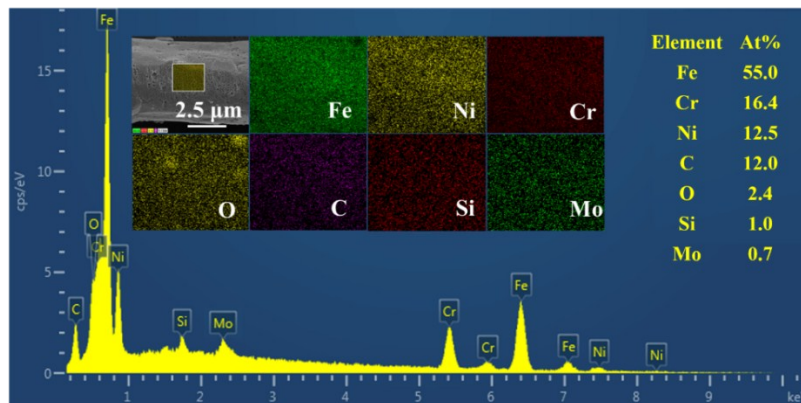

(c)

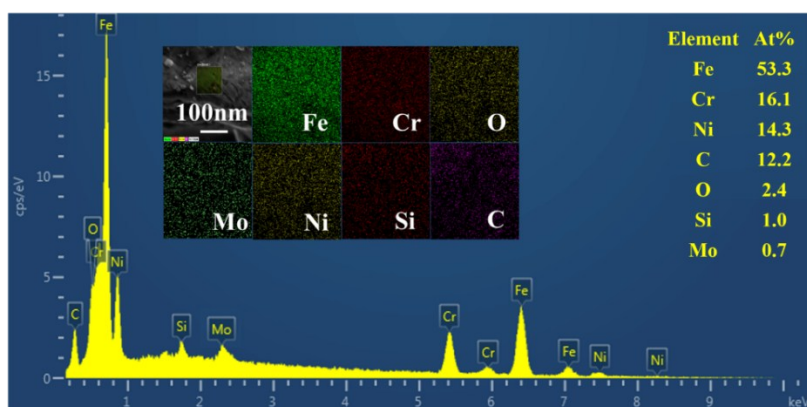

**Figure S2** SEM image of the bare SS (a), EDS and the corresponding elemental mappings for the bare SS within two randomly selected areas (b, c).

**Table S1** The atom % in the bare SS and K-doped FeOOH/Fe<sub>3</sub>O<sub>4</sub>/SS sample before and after electrochemical measurements.

| Atom % | Bare SS                              | K-doped FeOOH/Fe <sub>3</sub> O <sub>4</sub> /SS before GCD cycles | K-doped FeOOH/Fe <sub>3</sub> O <sub>4</sub> /SS after 10000 GCD cycles | K-doped FeOOH/SS  | FeOOH/SS          |
|--------|--------------------------------------|--------------------------------------------------------------------|-------------------------------------------------------------------------|-------------------|-------------------|
| Fe     | 55.0 <sup>a</sup> /53.3 <sup>b</sup> | 36.3 <sup>c</sup> /43.3 <sup>d</sup>                               | 42.4 <sup>e</sup>                                                       | 26.6 <sup>f</sup> | 40.9 <sup>g</sup> |
| C      | 12.0 <sup>a</sup> /12.2 <sup>b</sup> | 25.2 <sup>c</sup> /13.2 <sup>d</sup>                               | 18 <sup>e</sup>                                                         | 20.8 <sup>f</sup> | 11.8 <sup>g</sup> |
| O      | 2.4 <sup>a</sup> /2.4 <sup>b</sup>   | 15.9 <sup>c</sup> /19.7 <sup>d</sup>                               | 18.6 <sup>e</sup>                                                       | 41.6 <sup>f</sup> | 24.3 <sup>g</sup> |
| Ni     | 12.5 <sup>a</sup> /14.3 <sup>b</sup> | 11.4 <sup>c</sup> /11.9 <sup>d</sup>                               | 7.9 <sup>e</sup>                                                        | 5.7 <sup>f</sup>  | 11.0 <sup>g</sup> |
| Cr     | 16.4 <sup>a</sup> /16.1 <sup>b</sup> | 8.9 <sup>c</sup> /10.0 <sup>d</sup>                                | 11.8 <sup>e</sup>                                                       | 3.4 <sup>f</sup>  | 10.3 <sup>g</sup> |
| Mo     | 0.7 <sup>a</sup> /0.7 <sup>b</sup>   | 1.4 <sup>c</sup>                                                   | /                                                                       | /                 | /                 |
| Mn     | /                                    | 1.1 <sup>d</sup>                                                   | 1.2 <sup>e</sup>                                                        | /                 | 0.8 <sup>g</sup>  |
| Si     | 1.0 <sup>a</sup> /1.0 <sup>b</sup>   | 0.8 <sup>c</sup> /0.7 <sup>d</sup>                                 | /                                                                       | 0.3 <sup>f</sup>  | 0.4 <sup>g</sup>  |
| K      | /                                    | 0.1 <sup>c</sup> /0.1 <sup>d</sup>                                 | 0.1 <sup>e</sup>                                                        | 1.5 <sup>f</sup>  | /                 |
| S      | /                                    | /                                                                  | /                                                                       | 0.2 <sup>f</sup>  | 0.5 <sup>g</sup>  |

<sup>a</sup> The percentages of the atoms are calculated based on the EDS data in Figure S2b;

<sup>b</sup> The percentages of the atoms are calculated based on the EDS data in Figure S2c;

<sup>c</sup> The percentages of the atoms are calculated based on the EDS data in Figure 2b;

<sup>d</sup> The percentages of the atoms are calculated based on the EDS data in Figure 2c;

<sup>e</sup> The percentages of the atoms are calculated based on the EDS data in Figure 8a;

<sup>f</sup> The percentages of the atoms are calculated based on the EDS data in Figure S14a;

<sup>g</sup> The percentages of the atoms are calculated based on the EDS data in Figure S14b.

(a)

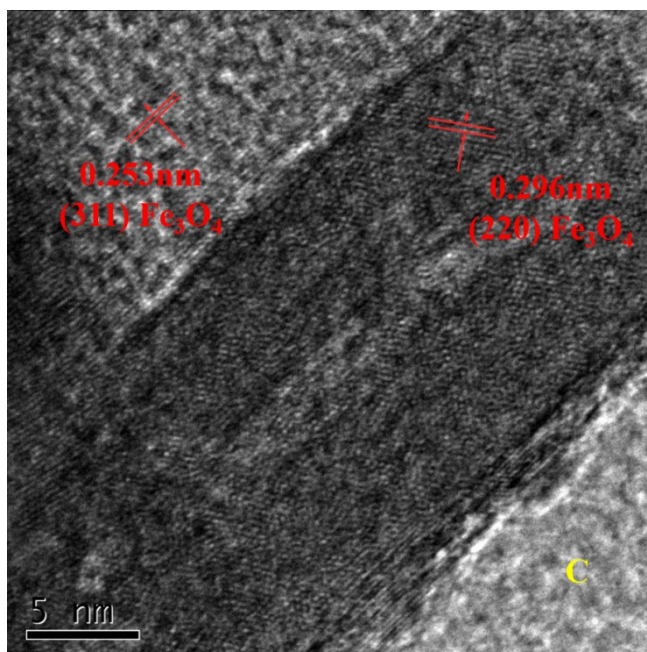

(b)

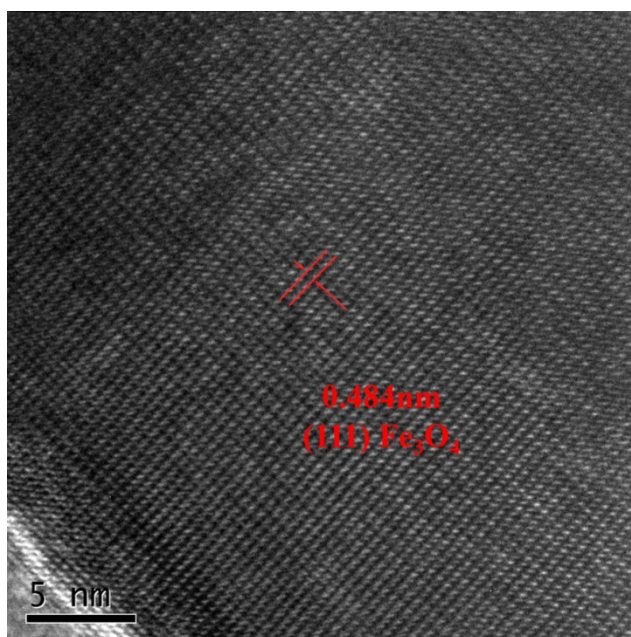

(c)

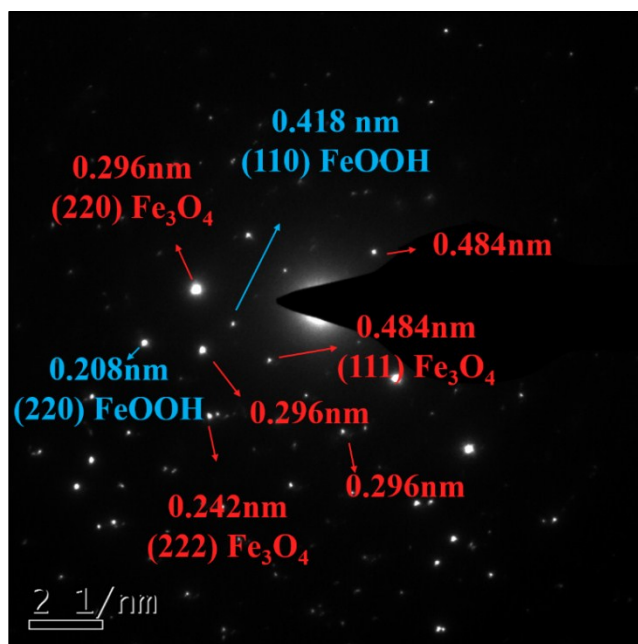

(d)

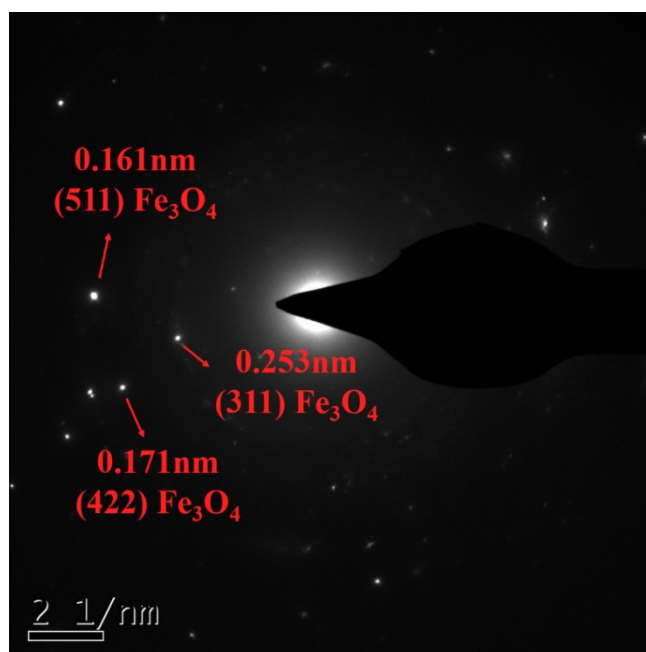

(e)

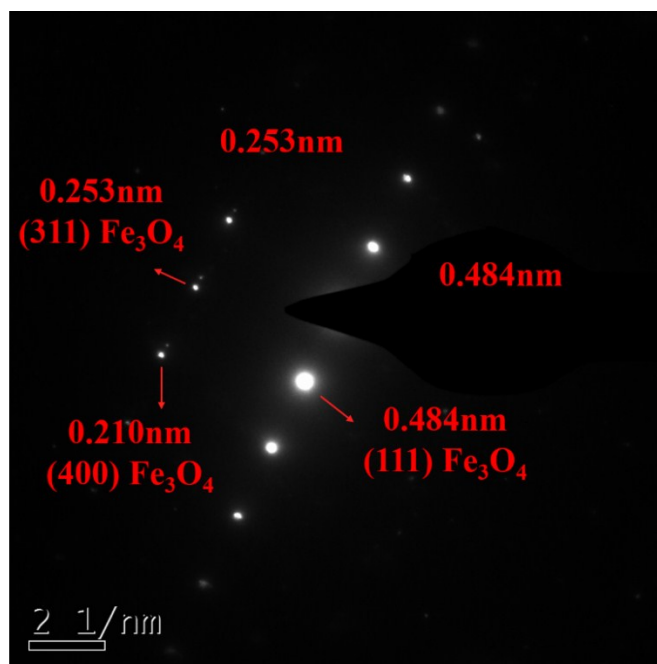

**Figure S3** HRTEM (a, b) and SAED images (c-e) for K-doped FeOOH/Fe<sub>3</sub>O<sub>4</sub>/SS nanocomposite.

(a)

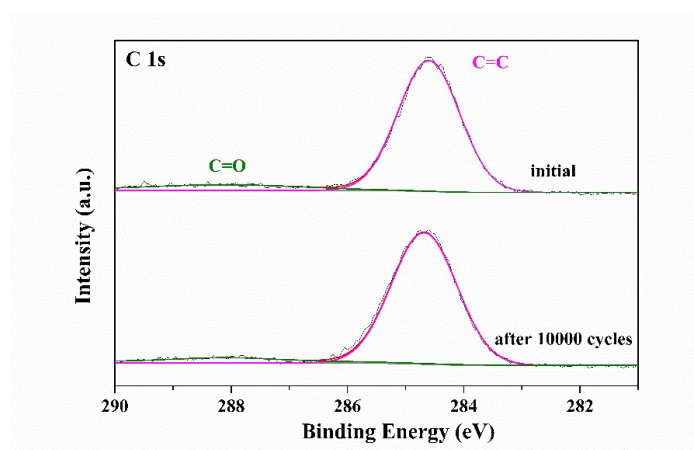

(b)

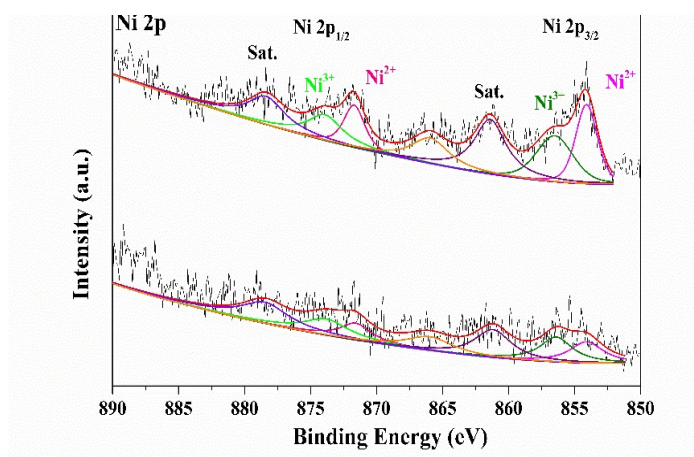

(c)

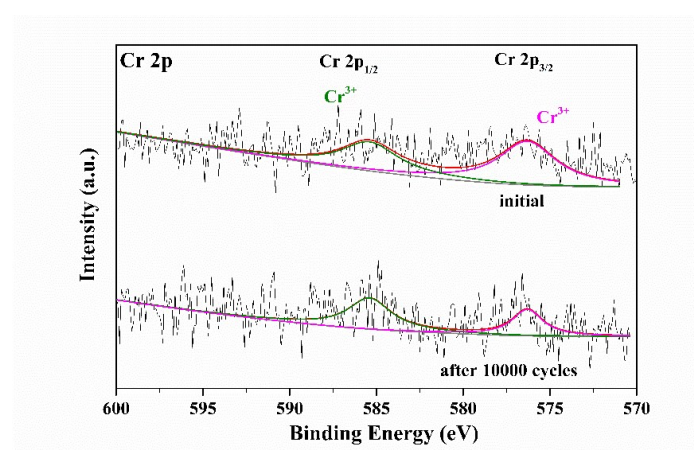

**Figure S4** The XPS fine spectra of C 1s (a), Ni 2p (b) and Cr 2p (c) for K-doped FeOOH/Fe<sub>3</sub>O<sub>4</sub>/SS before (above) and after (below) 10000 GCD cycles.



(a)

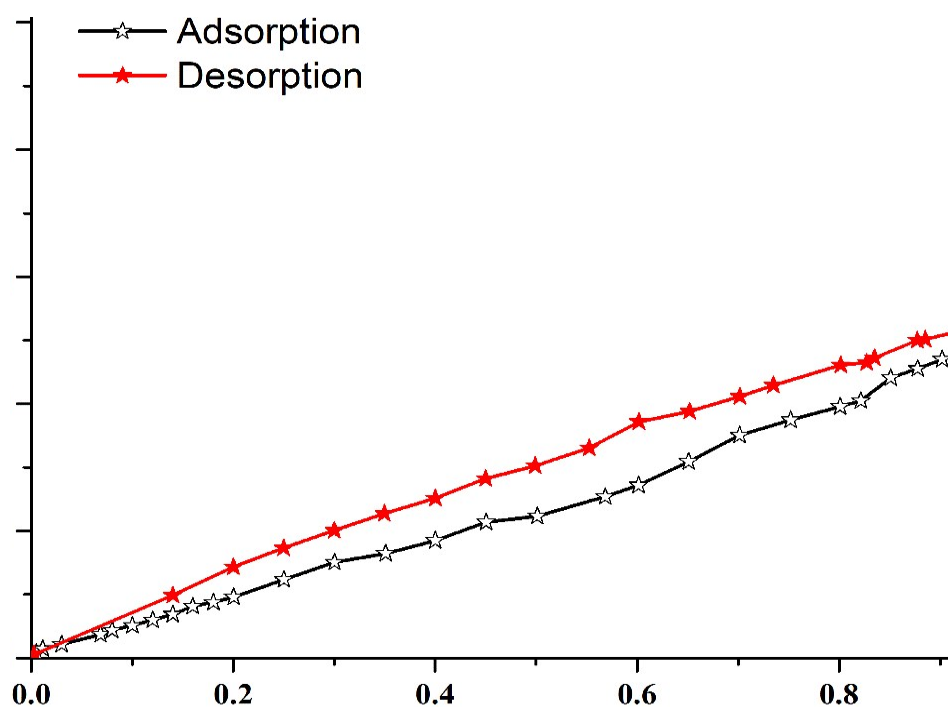

(b)

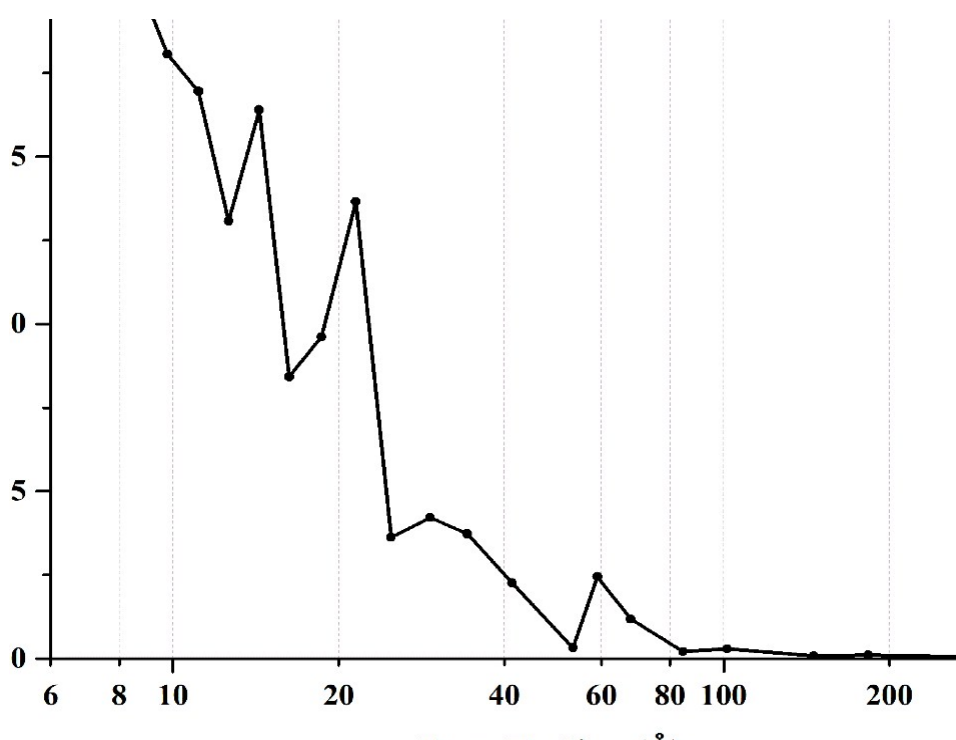

**Figure S5** Nitrogen adsorption-desorption isotherms (a) and pore size distribution (b) curves of K-doped  $\text{Fe}_3\text{O}_4@ \text{FeOOH}/\text{SS}$ .

(a)

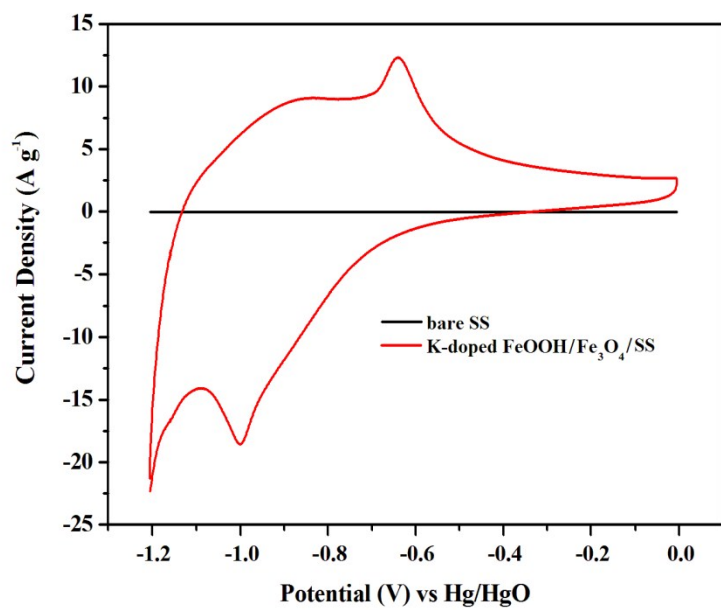

(b)

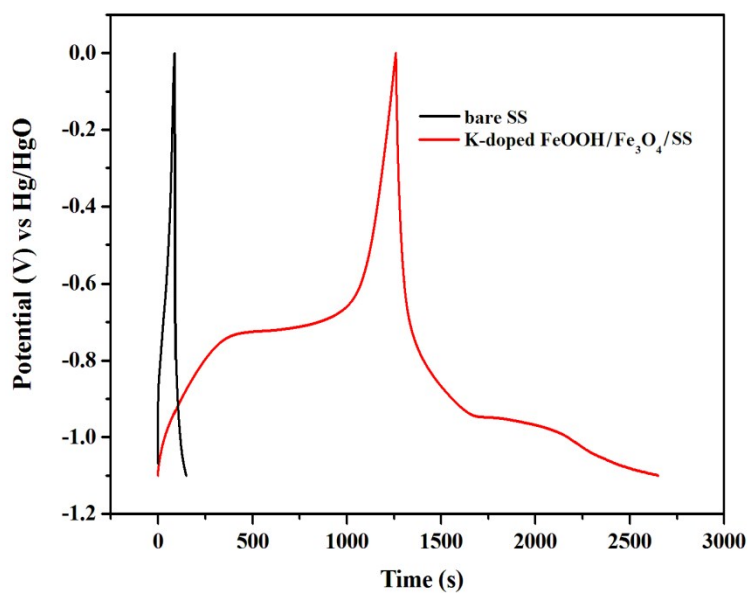

**Figure S6** CV at 10 mV s<sup>-1</sup> (a) and GCD curves at 1 A g<sup>-1</sup> (b) for the bare SS and K-doped Fe<sub>3</sub>O<sub>4</sub>/FeOOH/SS.

**Table S2** The electrochemical behaviors for iron oxides/hydroxides based anode materials reported previously.

| Sample                                                  | Electrolyte                                      | Current density (A g <sup>-1</sup> ) | Specific capacity (F g <sup>-1</sup> ) | Energy density                                       | Capacity retention                             | Ref. |
|---------------------------------------------------------|--------------------------------------------------|--------------------------------------|----------------------------------------|------------------------------------------------------|------------------------------------------------|------|
| FeOOH/C                                                 | 6 M KOH                                          | 0.5                                  | 396                                    | /                                                    | /                                              | 1    |
| Dy <sup>3+</sup> -doped Fe <sub>3</sub> O <sub>4</sub>  | 1 M Na <sub>2</sub> SO <sub>4</sub>              | 0.5                                  | 202                                    | /                                                    | /                                              | 2    |
| α-Fe <sub>2</sub> O <sub>3</sub> /rGO                   | 1 M KOH                                          | 1                                    | 903                                    | /                                                    | /                                              | 3    |
| Fe <sub>3</sub> O <sub>4</sub> NRs/NH <sub>2</sub> -rGO | 1 M Na <sub>2</sub> SO <sub>4</sub>              | 1                                    | 145                                    | /                                                    | /                                              | 4    |
| Fe <sub>3</sub> C/Fe <sub>3</sub> O <sub>4</sub> /C     | 6 M KOH                                          | 0.5                                  | 315                                    | /                                                    | /                                              | 5    |
| (AC)-Fe <sub>3</sub> O <sub>4</sub>                     | 6 M KOH                                          | 0.5                                  | 37.9                                   | /                                                    | /                                              | 6    |
| Fe <sub>2</sub> O <sub>3</sub> /N-rGO                   | 1 M KOH                                          | 0.5                                  | 618                                    | /                                                    | /                                              | 7    |
| Fe <sub>2</sub> O <sub>3</sub> NDs@NG                   | 2 M KOH                                          | 1                                    | 274                                    | /                                                    | /                                              | 8    |
| FeO <sub>x</sub> -CNFs                                  | 6 M KOH                                          | 1                                    | 460                                    | /                                                    | /                                              | 9    |
| FeOOH QDs                                               | 1 M Li <sub>2</sub> SO <sub>4</sub>              | 1                                    | 365                                    | /                                                    | /                                              | 10   |
| α-Fe <sub>2</sub> O <sub>3</sub> /C                     | 1 M Na <sub>2</sub> SO <sub>4</sub>              | 1                                    | 391.8                                  | 0.64 mWh cm <sup>-3</sup> at 14.8mW cm <sup>-3</sup> | 71.8% (4000 cycles at 200 mV s <sup>-1</sup> ) | 11   |
| PEDOP@Fe <sub>3</sub> O <sub>4</sub> NSs                | 1 M LiClO <sub>4</sub> /PC/15 wt% PMMA based gel | 1                                    | 673                                    | 93 Wh kg <sup>-1</sup> at 0.5 kW kg <sup>-1</sup>    | 83% (5000 cycles at 1 A g <sup>-1</sup> )      | 12   |
| Fe <sub>2</sub> O <sub>3</sub> /MWCNTs                  | 1 M Na <sub>2</sub> SO <sub>4</sub>              | 2                                    | 437.5                                  | 38 Wh kg <sup>-1</sup> at 800 W kg <sup>-1</sup>     | 65 % (500 cycles at 2 A g <sup>-1</sup> )      | 13   |
| G@Fe <sub>3</sub> O <sub>4</sub>                        | 2 M KOH                                          | 2                                    | 732                                    | 82.8 Wh kg <sup>-1</sup> at 2047 W kg <sup>-1</sup>  | 88.3% (10000 cycles at                         | 14   |

|                                                   |                                           |      |                                 |                                                       |                                               |           |
|---------------------------------------------------|-------------------------------------------|------|---------------------------------|-------------------------------------------------------|-----------------------------------------------|-----------|
|                                                   |                                           |      |                                 |                                                       | 20 A g <sup>-1</sup> )                        |           |
| Fe <sub>3</sub> O <sub>4</sub> @C                 | 6 M KOH                                   | 0.5  | 586                             | 18.3 Wh kg <sup>-1</sup> at 351 W kg <sup>-1</sup>    | 66.7% (1000 cycles at 5 A g <sup>-1</sup> )   | 15        |
| Fe <sub>3</sub> O <sub>4</sub> @CNF <sub>Mn</sub> | Gel Na <sub>2</sub> SO <sub>4</sub> /PV A | 1    | 306                             | 13 Wh kg <sup>-1</sup> at 65 W kg <sup>-1</sup>       | 85% (2000 cycles at 0.5 A g <sup>-1</sup> )   | 16        |
| MnO <sub>2</sub> @Fe <sub>2</sub> O <sub>3</sub>  | Gel Na <sub>2</sub> SO <sub>4</sub> /C MC | 0.69 | 91                              | 41.8 Wh kg <sup>-1</sup> at 1276 W kg <sup>-1</sup>   | 91% (3000 cycles at 100 mV s <sup>-1</sup> )  | 17        |
| FeOOH                                             | 2 M KOH                                   | 1    | 1066                            | 104 Wh kg <sup>-1</sup> at 1.27 kW kg <sup>-1</sup>   | 91% (10000 cycles at 30 A g <sup>-1</sup> )   | 18        |
| FeOOH/RGO                                         | 1 M Li <sub>2</sub> SO <sub>4</sub>       | 1    | 142.0                           | 16 Wh kg <sup>-1</sup> at 0.6 kW kg <sup>-1</sup>     | 90% (1000 cycles at 40 A g <sup>-1</sup> )    | 19        |
| Co-Fe <sub>3</sub> O <sub>4</sub> NS@NG           | 3 M KOH                                   | 1    | 775                             | 89.1 Wh kg <sup>-1</sup> at 0.901 kW kg <sup>-1</sup> | 97.1% (10000 cycles at 1 A g <sup>-1</sup> )  | 20        |
| K-doped FeOOH/Fe <sub>3</sub> O <sub>4</sub> /SS  | 2 M KOH                                   | 1    | 1296 (396 mAh g <sup>-1</sup> ) | 74.38 Wh kg <sup>-1</sup> at 3.64 W kg <sup>-1</sup>  | 85.6 % (3000 cycles at 30 A g <sup>-1</sup> ) | This work |

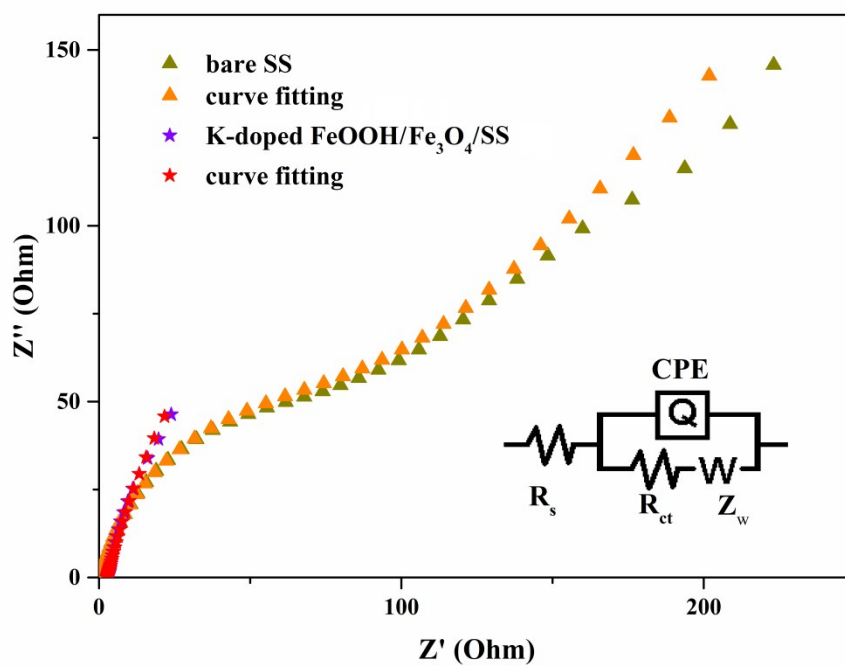

**Figure S7** Nyquist plots for the bare SS and K-doped FeOOH/Fe<sub>3</sub>O<sub>4</sub>/ SS

**Table S3** Parameters obtained from the simulation of the Nyquist plots for the bare SS and K-doped FeOOH/Fe<sub>3</sub>O<sub>4</sub>/SS before and after 5000/10000 GCD cycles.

| Sample                                                                     | $R_{ct}(\Omega \text{ cm}^{-2})$ | $R_s(\Omega \text{ cm}^{-2})$ |
|----------------------------------------------------------------------------|----------------------------------|-------------------------------|
| bare SS                                                                    | 85.3                             | 0.9698                        |
| K-doped FeOOH/Fe <sub>3</sub> O <sub>4</sub> /SS                           | 376.8                            | 2.754                         |
| K-doped FeOOH/Fe <sub>3</sub> O <sub>4</sub> /SS<br>after 5000 GCD cycles  | 49.1                             | 0.8743                        |
| K-doped FeOOH/Fe <sub>3</sub> O <sub>4</sub> /SS<br>after 10000 GCD cycles | 92.1                             | 1.038                         |

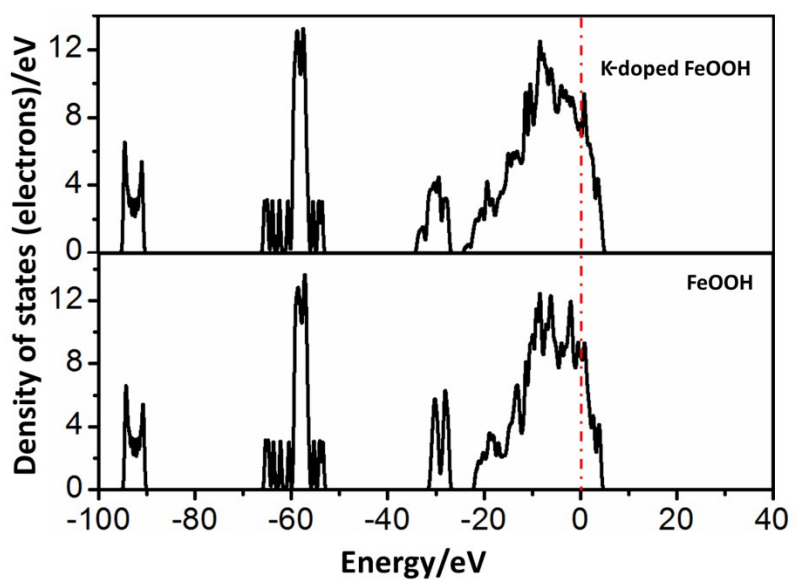

**Figure S8** The comparative TDOS for the K-doped and -undoped FeOOH.

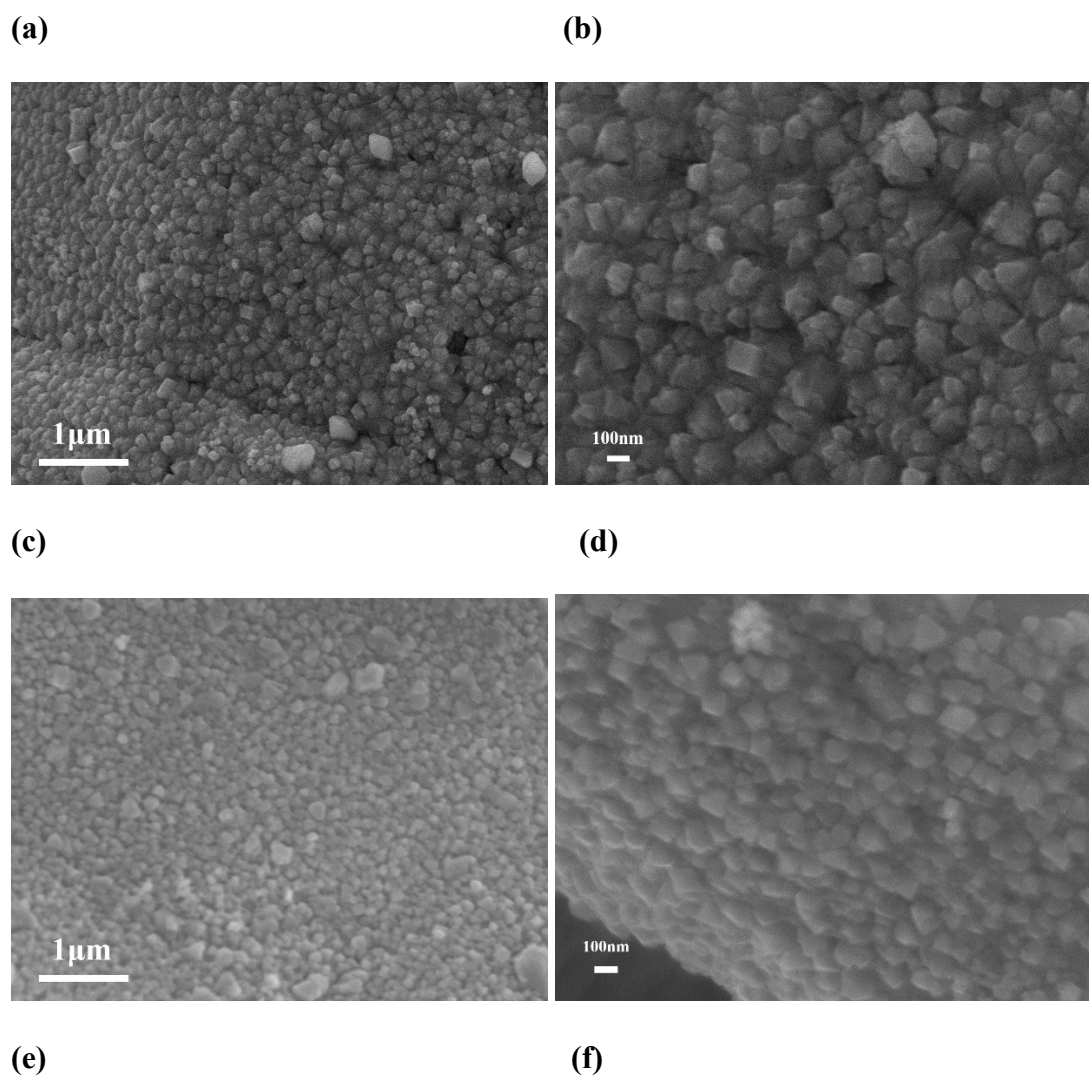

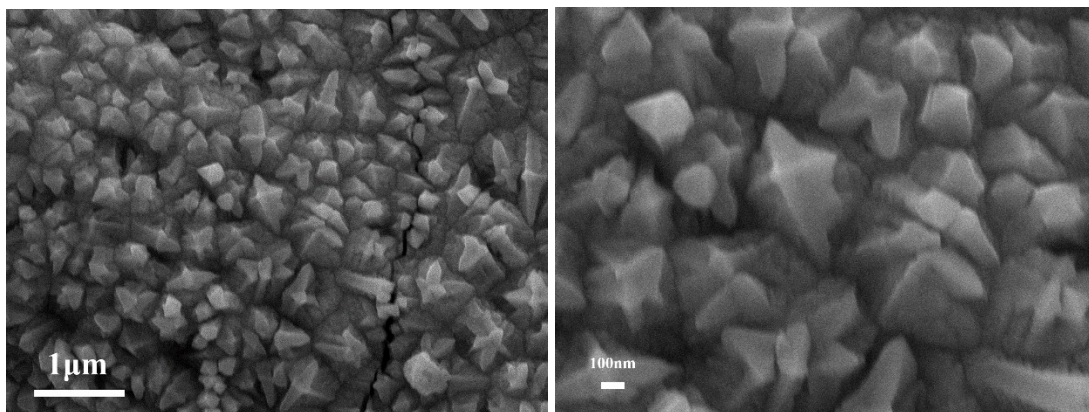

**Figure S9** SEM images of K-doped FeOOH/Fe<sub>3</sub>O<sub>4</sub>/SS composites prepared under different reaction temperatures: 140 °C (**a, b**), 160 °C (**c, d**) and 180 °C (**e, f**).



(a)

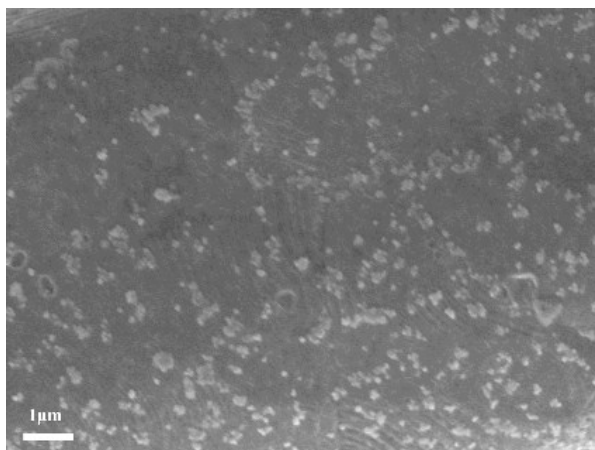

(b)

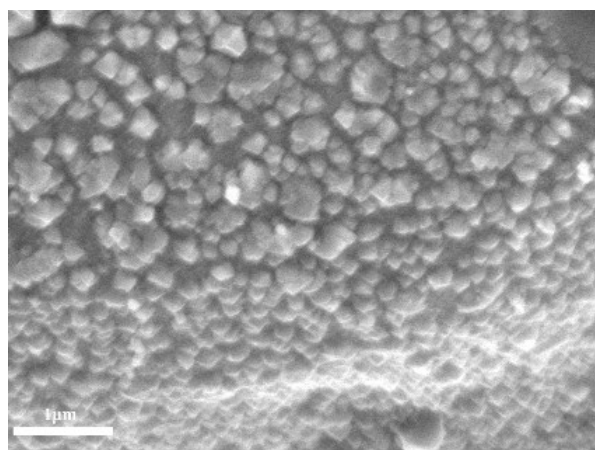

(c)

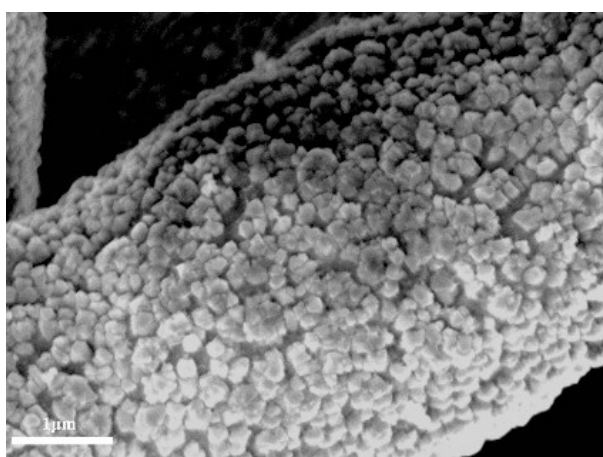

**Figure S10** SEM images of K-doped FeOOH/Fe<sub>3</sub>O<sub>4</sub>/SS composites prepared with different amounts of KOH: 0.50 mmol (a), 0.75 mmol (b) and 1.00 mmol (c).

(a)

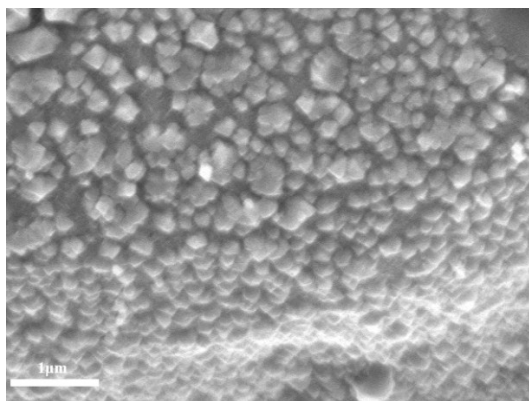

(b)

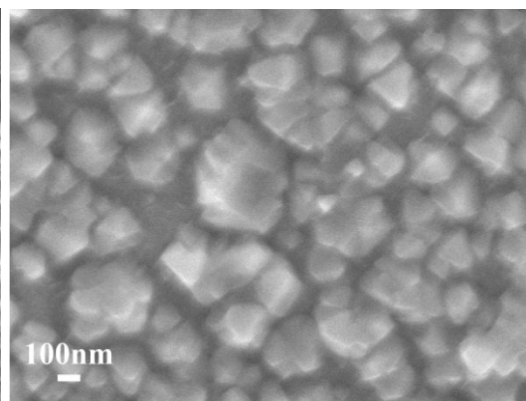

(c)

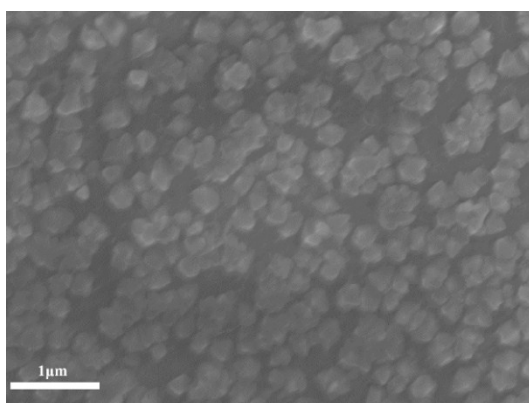

(d)

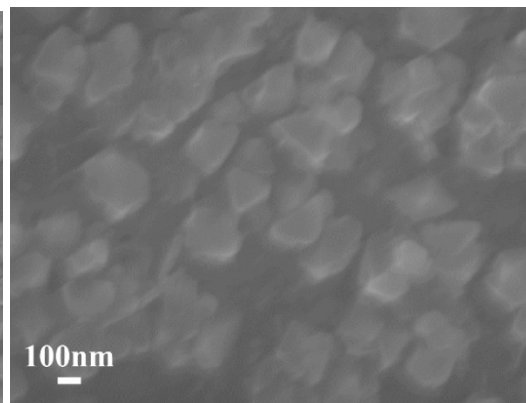

**Figure S11** SEM images of K-doped FeOOH/Fe<sub>3</sub>O<sub>4</sub>/SS composites prepared under different reaction times: 12 h (**a, b**) and 24 h (**c, d**).

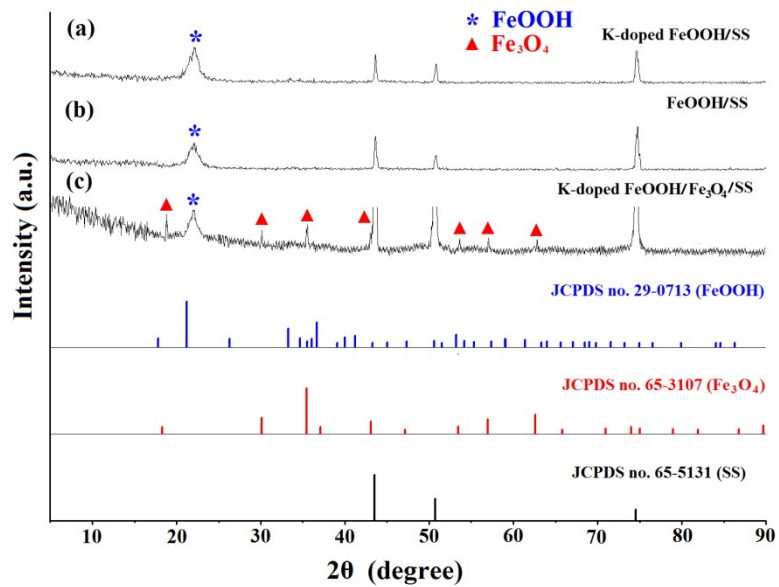

**Figure S12** XRD patterns of the samples prepared in the absence of  $\text{H}_2\text{O}_2$  (a) or KOH (b) in comparison with K-doped  $\text{FeOOH}/\text{Fe}_3\text{O}_4/\text{SS}$  (c).

(a)

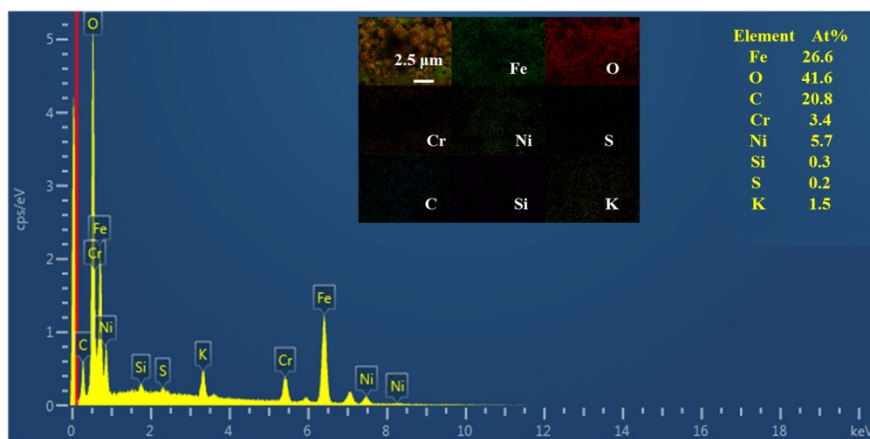

(b)

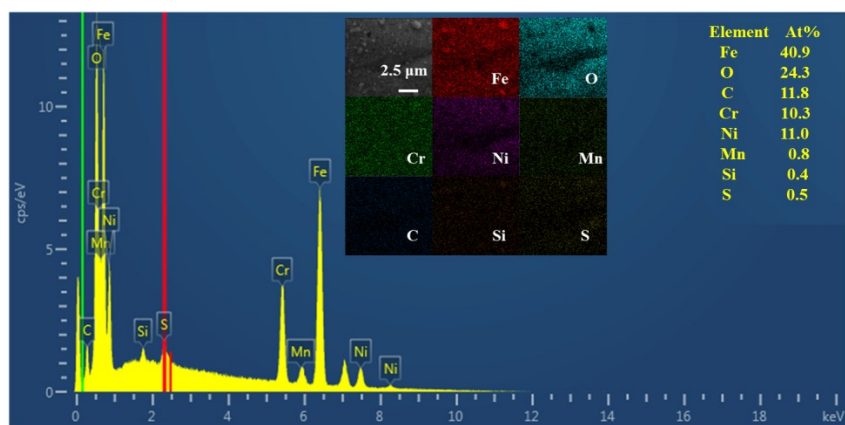

**Figure S13** EDS and elemental mapping images of K-doped FeOOH/SS (a) and FeOOH/SS (b) prepared in the absence of H<sub>2</sub>O<sub>2</sub> or KOH, respectively.

(a)

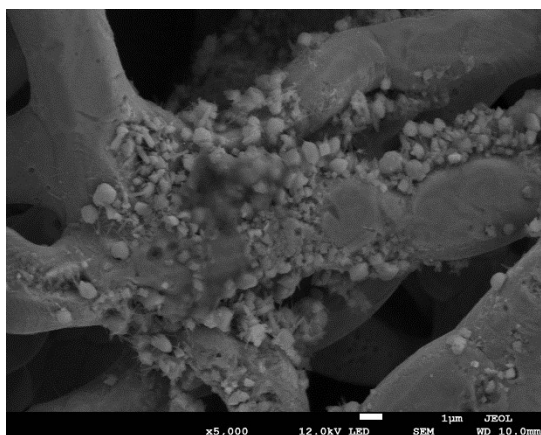

(b)

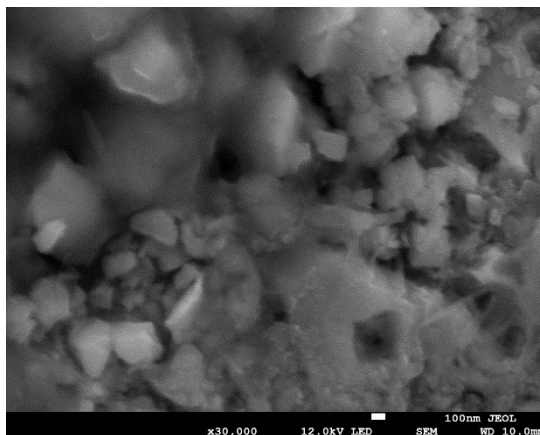

(c)

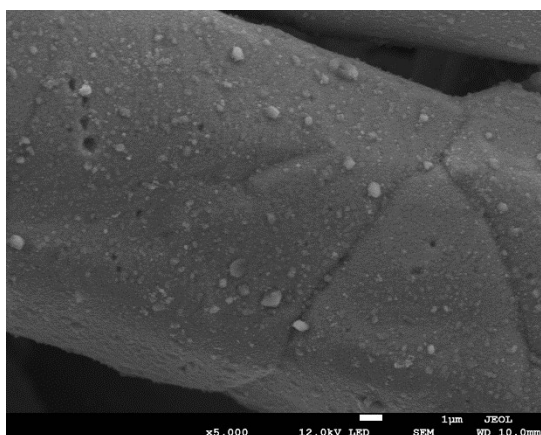

(d)

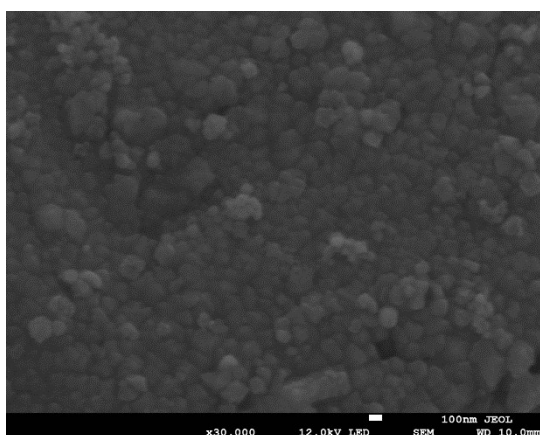

(e)

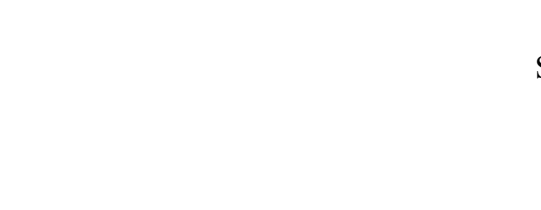

(f)

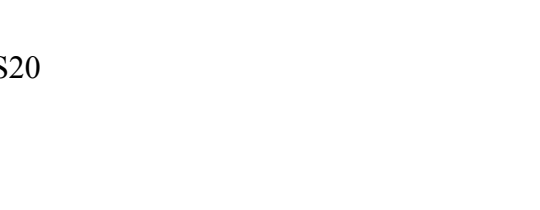

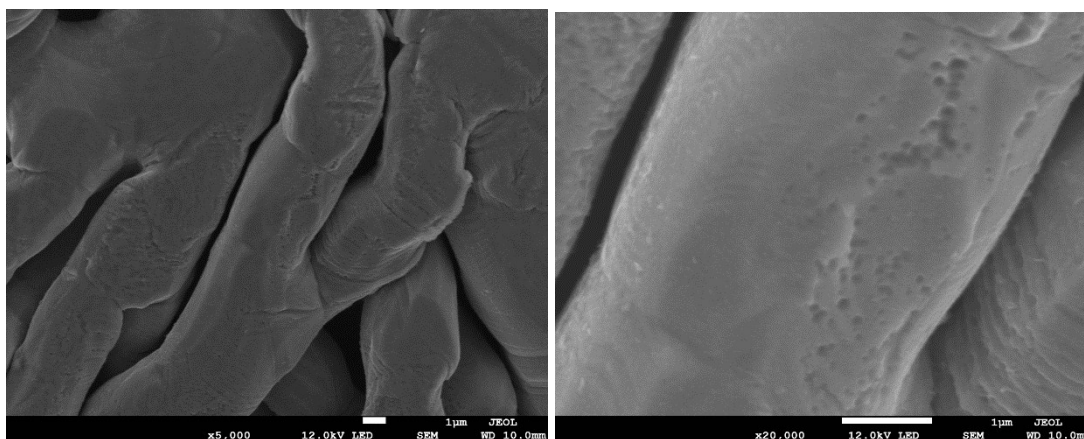

**Figure S14** SEM images K-doped FeOOH/SS (a, b) and FeOOH/SS (c-f).

(a)

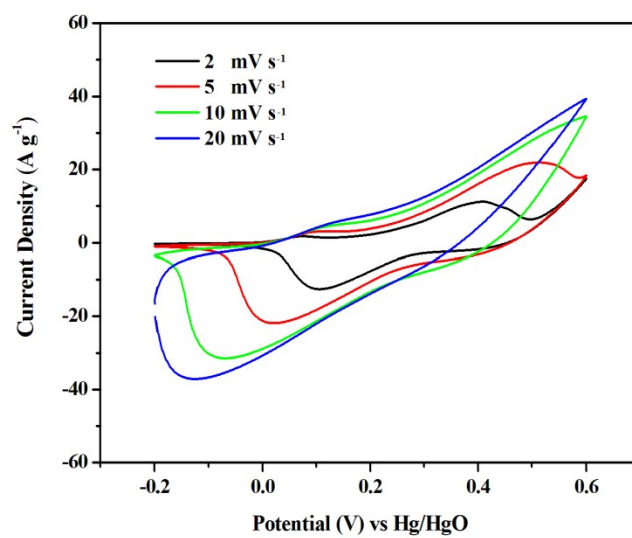

(b)

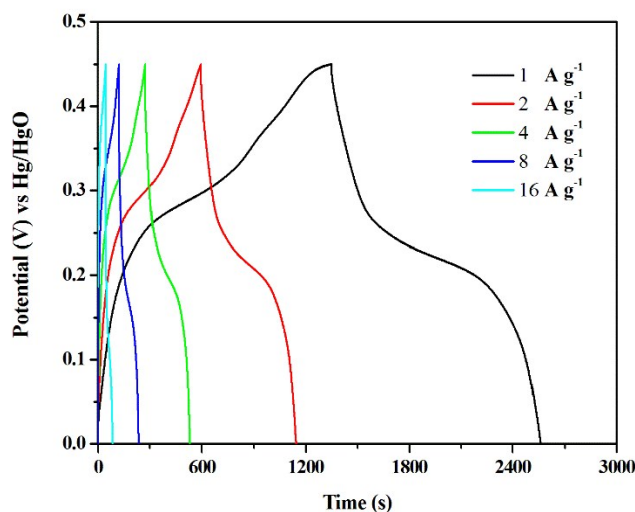

**Figure S15** CVs at different scan rates (a) and GCD curves at different current densities for Co-Mo-O/Ni<sub>3</sub>S<sub>2</sub>/NF (b).

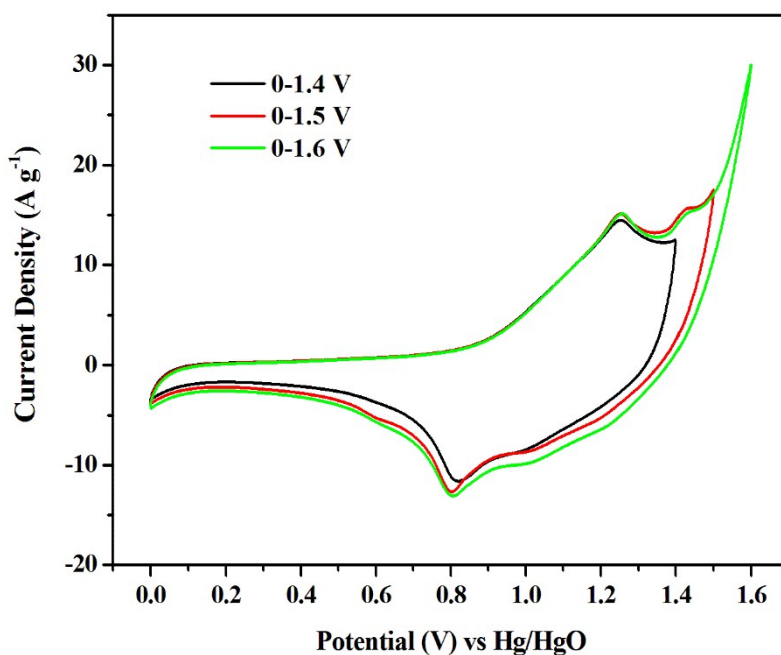

**Figure S16** CV curves of the Co-Mo-O/Ni<sub>3</sub>S<sub>2</sub>/NF // K-doped FeOOH/Fe<sub>3</sub>O<sub>4</sub>/SS device at 20 mV s<sup>-1</sup> in different voltage windows.

## Reference

1. M. Aghazadeh and M. R. Ganjali, *Ceramics International*, 2018, **44**, 520-529.
2. J. Li, D. Chen, Q. Wu, X. Wang, Y. Zhang and Q. Zhang, *New Journal of Chemistry*, 2018, **42**, 4513-4519.

3. D. Chen, S. Zhou, H. Quan, R. Zou, W. Gao, X. Luo and L. Guo, *Chemical Engineering Journal*, 2018, **341**, 102-111.
4. F. Zhu, *International Journal of Electrochemical Science*, 2017, **12**, 7197-7204.
5. L. Yao, J. Yang, P. Zhang and L. Deng, *Bioresource Technology*, 2018, **256**, 208-215.
6. X. Du, C. Wang, M. Chen, Y. Jiao and J. Wang, *The Journal of Physical Chemistry C*, 2009, **113**, 2643-2646.
7. Z. Ma, X. Huang, S. Dou, J. Wu and S. Wang, *The Journal of Physical Chemistry C*, 2014, **118**, 17231-17239.
8. L. Liu, J. Lang, P. Zhang, B. Hu and X. Yan, *ACS Applied Materials & Interfaces*, 2016, **8**, 9335-9344.
9. R. Pai, A. Singh, S. Simotwo and V. Kalra, *Advanced Engineering Materials*, 2018, **0**, 1701116.
10. J. Liu, M. Zheng, X. Shi, H. Zeng and H. Xia, *Advanced Functional Materials*, 2015, **26**, 919-930.
11. H. Quan, B. Cheng, Y. Xiao and S. Lei, *Chemical Engineering Journal*, 2016, **286**, 165-173.
12. B. N. Reddy, S. Deshagani, M. Deepa and P. Ghosal, *Chemical Engineering Journal*, 2018, **334**, 1328-1340.
13. S. S. Raut and B. R. Sankapal, *New Journal of Chemistry*, 2016, **40**, 2619-2627.
14. J. Lin, H. Liang, H. Jia, S. Chen, J. Guo, J. Qi, C. Qu, J. Cao, W. Fei and J. Feng, *Journal of Materials Chemistry A*, 2017, **5**, 24594-24601.
15. H. Fan, R. Niu, J. Duan, W. Liu and W. Shen, *ACS Applied Materials & Interfaces*, 2016, **8**, 19475-19483.
16. N. Iqbal, X. Wang, A. A. Babar, G. Zainab, J. Yu and B. Ding, *Scientific Reports*, 2017, **7**, 15153.
17. G. S. Gund, D. P. Dubal, N. R. Chodankar, J. Y. Cho, P. Gomez-Romero, C. Park and C. D. Lokhande, *Scientific Reports*, 2015, **5**, 12454.
18. K. A. Owusu, L. Qu, J. Li, Z. Wang, K. Zhao, C. Yang, K. M. Hercule, C. Lin, C. Shi, Q. Wei, L. Zhou and L. Mai, *Nature Communications*, 2017, **8**, 14264.
19. H.-W. Chang, C.-L. Dong, Y.-R. Lu, Y.-C. Huang, J.-L. Chen, C. L. Chen, W.-C. Chou, Y.-C. Tsai, J.-M. Chen and J.-F. Lee, *ACS Sustainable Chemistry & Engineering*, 2017, **5**, 3186-3194.
20. M. Guo, J. Balamurugan, X. Li, H. Kim Nam and H. Lee Joong, *Small*, 2017, **13**, 1701275.
